# Supplementary material
Source: HighWire-hosted journal article supplement (https://jnis.bmj.com/content/15/3/242)
Supplement: inline-supplementary-material-1 [file inline-supplementary-material-1.pdf]

Supplementary Table 1. List of ICD-9-CM codes used for data extraction, 2010-2015, NRD.

|                                      | ICD-9-CM code                                             | Description                                                                                                  |
|--------------------------------------|-----------------------------------------------------------|--------------------------------------------------------------------------------------------------------------|
| Asymptomatic carotid artery stenosis | 433.10                                                    | Occlusion and stenosis of carotid artery without mention of cerebral infarction                              |
|                                      | 433.30                                                    | Occlusion and stenosis of multiple and bilateral precerebral arteries without mention of cerebral infarction |
| Symptomatic carotid artery stenosis  | 433.11, 433.31, 433.81, 433.91                            | Occlusion and stenosis of carotid and precerebral arteries with cerebral infarction                          |
|                                      | 434.01, 434.11, 434.91                                    | Cerebral thrombosis, embolism, or artery occlusion with cerebral infarction                                  |
|                                      | 435.8-435.9                                               | Transient cerebral ischemia                                                                                  |
|                                      | 437.1                                                     | Other generalized ischemic cerebrovascular disease                                                           |
|                                      | 362.34, 362.84, 368.12                                    | Transient retinal arterial occlusion, retinal ischemia, or transient visual loss                             |
| Carotid endarterectomy               | 38.12                                                     | Endarterectomy, other vessels of head and neck                                                               |
| Carotid artery stenting              | 39.90                                                     | Insertion of non-drug-eluting peripheral (non-coronary) vessel stent(s)                                      |
|                                      | 00.63                                                     | Percutaneous insertion of carotid artery stent(s)                                                            |
| Complications or adverse events      | 410, 410.0-410.9, 410.00-410.92, 997.1                    | Cardiac events                                                                                               |
|                                      | 415, 415.0, 415.1, 415.11, 415.19                         | Pulmonary embolization                                                                                       |
|                                      | 453.2, 453.4, 453.41, 453.42, 453.8, 453.81-453.89, 483.9 | Deep vein thrombosis                                                                                         |
|                                      | 451, 451.0-451.9, 451.11-451.89                           | Phlebitis & thrombophlebitis                                                                                 |
|                                      | 518.4, 518.5, 518.51-518.53, 518.81                       | Acute respiratory failure                                                                                    |
|                                      | 584, 584.5-584.9                                          | Acute renal failure                                                                                          |
|                                      | 780.3, 780.31, 780.39                                     | Seizure                                                                                                      |
|                                      | 997.02                                                    | Iatrogenic cerebrovascular infarction or hemorrhage                                                          |
|                                      | 998.1, 998.11, 998.12                                     | Hematoma/Hemorrhage                                                                                          |

Supplementary Table 2. Comparison of baseline characteristics of patients treated for symptomatic and asymptomatic carotid stenosis, 2010-2015.

| Factors                   | Asymptomatic carotid stenosis (n=522040) |                   |         | Symptomatic carotid stenosis (n=55485) |                   |         |
|---------------------------|------------------------------------------|-------------------|---------|----------------------------------------|-------------------|---------|
|                           | CEA (n=460811)                           | CAS (n=61229)     | p-value | CEA (n=44766)                          | CAS (n=10719)     | p-value |
|                           | No. of events (%)                        | No. of events (%) |         | No. of events (%)                      | No. of events (%) |         |
| Age Groups                |                                          |                   | < 0.001 |                                        |                   | < 0.001 |
| <65 years                 | 104008 (22.6)                            | 14685 (24.0)      |         | 13582 (30.3)                           | 3611 (33.7)       |         |
| 65-79 years               | 265169 (57.5)                            | 34334 (56.1)      |         | 22261 (49.7)                           | 4937 (46.1)       |         |
| ≥80 years                 | 91634 (19.9)                             | 12210 (19.9)      |         | 8922 (19.9)                            | 2171 (20.3)       |         |
| Sex                       |                                          |                   | < 0.001 |                                        |                   | 0.007   |
| Female                    | 193147 (41.9)                            | 23738 (38.8)      |         | 16936 (37.8)                           | 3905 (36.4)       |         |
| Male                      | 267664 (58.1)                            | 37491 (61.2)      |         | 27830 (62.2)                           | 6814 (63.6)       |         |
| Median household income   |                                          |                   | < 0.001 |                                        |                   | < 0.001 |
| 1 <sup>st</sup> quartile  | 131059 (28.9)                            | 18737 (31.0)      |         | 12349 (28.0)                           | 3145 (30.0)       |         |
| 2 <sup>nd</sup> quartile  | 128439 (28.3)                            | 17684 (29.3)      |         | 11897 (27.0)                           | 2917 (27.8)       |         |
| 3 <sup>rd</sup> quartile  | 110238 (24.3)                            | 14246 (23.6)      |         | 11023 (25.0)                           | 2641 (25.2)       |         |
| 4 <sup>th</sup> quartile  | 83817 (18.5)                             | 9690 (16.1)       |         | 8760 (19.9)                            | 1796 (17.1)       |         |
| Insurance                 |                                          |                   | < 0.001 |                                        |                   | < 0.001 |
| Medicare                  | 347947 (75.7)                            | 46698 (76.5)      |         | 30572 (68.4)                           | 7063 (66.0)       |         |
| Medicaid                  | 14532 (3.2)                              | 2435 (4.0)        |         | 2318 (5.2)                             | 773 (7.2)         |         |
| Private                   | 84287 (18.3)                             | 9587 (15.7)       |         | 9170 (20.5)                            | 2128 (19.9)       |         |
| Self-pay/No charge/Other  | 13057 (2.8)                              | 2287 (3.7)        |         | 2615 (5.9)                             | 733 (6.9)         |         |
| Hospital size             |                                          |                   | < 0.001 |                                        |                   | < 0.001 |
| Small                     | 50479 (11.0)                             | 4321 (7.1)        |         | 3700 (8.3)                             | 447 (4.2)         |         |
| Medium                    | 101797 (22.1)                            | 11695 (19.1)      |         | 9860 (22.0)                            | 1761 (16.4)       |         |
| Large                     | 308535 (67.0)                            | 45213 (73.8)      |         | 31206 (69.7)                           | 8510 (79.4)       |         |
| Hospital Ownership Status |                                          |                   | < 0.001 |                                        |                   | < 0.001 |
| Government, nonfederal    | 46270 (10.0)                             | 6777 (11.1)       |         | 4744 (10.6)                            | 1426 (13.3)       |         |
| Private, not-profit       | 339265 (73.6)                            | 45323 (74.0)      |         | 33634 (75.1)                           | 7761 (72.4)       |         |
| Private, invest-own       | 75277 (16.3)                             | 9129 (14.9)       |         | 6388 (14.3)                            | 1532 (14.3)       |         |
| Hospital City Status      |                                          |                   | < 0.001 |                                        |                   | < 0.001 |
| Large City (>1ml)         | 202490 (43.9)                            | 30613 (50.0)      |         | 21592 (48.2)                           | 6886 (64.2)       |         |
| Small City (<1ml)         | 258321 (56.1)                            | 30616 (50.0)      |         | 23174 (51.8)                           | 3833 (35.8)       |         |
| Hospital Teaching Status  |                                          |                   | < 0.001 |                                        |                   | < 0.001 |
| Non-teaching              | 217122 (47.1)                            | 23255 (38.0)      |         | 17951 (40.1)                           | 3050 (28.5)       |         |
| Teaching                  | 243689 (52.9)                            | 37975 (62.0)      |         | 26815 (59.9)                           | 7669 (71.5)       |         |
| APR-DRG Mortality Risk    |                                          |                   | < 0.001 |                                        |                   | < 0.001 |
| Minor                     | 306297 (66.5)                            | 35571 (58.1)      |         | 10363 (23.1)                           | 1231 (11.5)       |         |
| Moderate                  | 126012 (27.3)                            | 20071 (32.8)      |         | 27210 (60.8)                           | 6050 (56.4)       |         |
| Major                     | 23130 (5.0)                              | 4609 (7.5)        |         | 5655 (12.6)                            | 2093 (19.5)       |         |
| Extreme                   | 5372 (1.2)                               | 979 (1.6)         |         | 1537 (3.4)                             | 1346 (12.6)       |         |
| APR-DRG Severity          |                                          |                   | < 0.001 |                                        |                   | < 0.001 |
| Minor                     | 271063 (58.8)                            | 30832 (50.4)      |         | 8209 (18.3)                            | 970 (9.0)         |         |
| Moderate                  | 157018 (34.1)                            | 24458 (39.9)      |         | 13439 (30.0)                           | 2211 (20.6)       |         |
| Major                     | 27685 (6.0)                              | 5208 (8.5)        |         | 21597 (48.2)                           | 6207 (57.9)       |         |
| Extreme                   | 5046 (1.1)                               | 731 (1.2)         |         | 1520 (3.4)                             | 1331 (12.4)       |         |
| Comorbidity               |                                          |                   | < 0.001 |                                        |                   | < 0.001 |
| Score (Mean ± SD)         | 2.33 ± 1.50                              | 2.42 ± 1.57       |         | 2.64 ± 1.69                            | 3.13 ± 1.87       |         |

Supplementary Table 3. Comparison of baseline characteristics of patients treated for asymptomatic carotid stenosis after matching, 2010-2015.

| Factors                   | Asymptomatic carotid stenosis or occlusion (30-day) |                   |         | Asymptomatic carotid stenosis or occlusion (90-day) |                   |         |
|---------------------------|-----------------------------------------------------|-------------------|---------|-----------------------------------------------------|-------------------|---------|
|                           | CEA (n=19900)                                       | CAS (n=19900)     | p-value | CEA (n=17116)                                       | CAS (n=17116)     | p-value |
|                           | No. of events (%)                                   | No. of events (%) |         | No. of events (%)                                   | No. of events (%) |         |
| Age Groups                |                                                     |                   | 0.91    |                                                     |                   | 0.61    |
| <65 years                 | 4314 (21.7)                                         | 4349 (21.9)       |         | 3678 (21.5)                                         | 3746 (21.9)       |         |
| 65-79 years               | 11505 (57.8)                                        | 11480 (57.7)      |         | 9912 (57.9)                                         | 9831 (57.4)       |         |
| ≥80 years                 | 4081 (20.5)                                         | 4071 (20.5)       |         | 3526 (20.6)                                         | 3539 (20.7)       |         |
| Sex                       |                                                     |                   | 0.88    |                                                     |                   | 0.70    |
| Female                    | 7798 (39.2)                                         | 7783 (39.1)       |         | 6685 (39.1)                                         | 6720 (39.3)       |         |
| Male                      | 12102 (60.8)                                        | 12117 (60.9)      |         | 10431 (60.9)                                        | 10396 (60.7)      |         |
| Median household income   |                                                     |                   | 0.69    |                                                     |                   | 0.73    |
| 1 <sup>st</sup> quartile  | 6129 (30.8)                                         | 6114 (30.7)       |         | 5258 (30.7)                                         | 5199 (30.4)       |         |
| 2 <sup>nd</sup> quartile  | 5386 (27.1)                                         | 5298 (26.6)       |         | 4640 (27.1)                                         | 4598 (26.9)       |         |
| 3 <sup>rd</sup> quartile  | 4750 (23.9)                                         | 4789 (24.1)       |         | 4119 (24.1)                                         | 4159 (24.3)       |         |
| 4 <sup>th</sup> quartile  | 3635 (18.3)                                         | 3699 (18.6)       |         | 3099 (18.1)                                         | 3160 (18.5)       |         |
| Insurance                 |                                                     |                   | 0.17    |                                                     |                   | 0.13    |
| Medicare                  | 15756 (79.2)                                        | 15665 (78.7)      |         | 13531 (79.1)                                        | 13450 (78.5)      |         |
| Medicaid                  | 636 (3.2)                                           | 655 (3.3)         |         | 552 (3.2)                                           | 599 (3.5)         |         |
| Private                   | 3014 (15.1)                                         | 3017 (15.2)       |         | 2598 (15.2)                                         | 2576 (15.1)       |         |
| Self-pay/No charge/Other  | 494 (2.5)                                           | 563 (2.8)         |         | 435 (2.5)                                           | 491 (2.9)         |         |
| Hospital size             |                                                     |                   | 0.95    |                                                     |                   | 0.68    |
| Small                     | 1168 (5.9)                                          | 1183 (5.9)        |         | 1043 (6.1)                                          | 1074 (6.3)        |         |
| Medium                    | 4110 (20.7)                                         | 4100 (20.6)       |         | 3675 (21.5)                                         | 3627 (21.2)       |         |
| Large                     | 14622 (73.5)                                        | 14617 (73.5)      |         | 12398 (72.4)                                        | 12415 (72.5)      |         |
| Hospital Ownership Status |                                                     |                   | 0.47    |                                                     |                   | 0.21    |
| Government, nonfederal    | 2374 (11.9)                                         | 2389 (12.0)       |         | 2018 (11.8)                                         | 2091 (12.2)       |         |
| Private, not-profit       | 14432 (72.5)                                        | 14333 (72.0)      |         | 12374 (72.3)                                        | 12229 (71.4)      |         |
| Private, invest-own       | 3094 (15.5)                                         | 3178 (16.0)       |         | 2724 (15.9)                                         | 2796 (16.3)       |         |
| Hospital City Status      |                                                     |                   | 0.97    |                                                     |                   | 0.77    |
| Large City (>1ml)         | 10427 (52.4)                                        | 10431 (52.4)      |         | 8959 (52.3)                                         | 8932 (52.2)       |         |
| Small City (<1ml)         | 9473 (47.6)                                         | 9469 (47.6)       |         | 8157 (47.7)                                         | 8184 (47.8)       |         |
| Hospital Teaching Status  |                                                     |                   | >0.99   |                                                     |                   | 0.87    |
| Non-teaching              | 7933 (39.9)                                         | 7933 (39.9)       |         | 6738 (39.4)                                         | 6723 (39.3)       |         |
| Teaching                  | 11967 (60.1)                                        | 11967 (60.1)      |         | 10378 (60.6)                                        | 10393 (60.7)      |         |
| APR-DRG Mortality Risk    |                                                     |                   | 0.66    |                                                     |                   | 0.55    |
| Minor                     | 12119 (60.9)                                        | 12049 (60.5)      |         | 10329 (60.3)                                        | 10285 (60.1)      |         |
| Moderate                  | 6556 (32.9)                                         | 6567 (33.0)       |         | 5710 (33.4)                                         | 5690 (33.2)       |         |
| Major                     | 1125 (5.7)                                          | 1179 (5.9)        |         | 977 (5.7)                                           | 1040 (6.1)        |         |
| Extreme                   | 100 (0.5)                                           | 105 (0.5)         |         | 100 (0.6)                                           | 101 (0.6)         |         |
| APR-DRG Severity          |                                                     |                   | 0.78    |                                                     |                   | 0.18    |
| Minor                     | 10698 (53.8)                                        | 10633 (53.4)      |         | 9241 (54.0)                                         | 9074 (53.0)       |         |
| Moderate                  | 7905 (39.7)                                         | 7942 (39.9)       |         | 6735 (39.3)                                         | 6838 (40.0)       |         |
| Major                     | 1209 (6.1)                                          | 1244 (6.3)        |         | 1055 (6.2)                                          | 1126 (6.6)        |         |
| Extreme                   | 88 (0.4)                                            | 81 (0.4)          |         | 85 (0.5)                                            | 78 (0.5)          |         |
| Comorbidity               |                                                     |                   | 0.50    |                                                     |                   | 0.29    |
| Score (Mean ± SD)         | 2.36 ± 1.48                                         | 2.37 ± 1.50       |         | 2.37 ± 1.50                                         | 2.39 ± 1.52       |         |

Supplementary Table 4. Comparison of baseline characteristics of patients treated for symptomatic carotid stenosis after matching, 2010-2015.

| Factors                   | Symptomatic carotid stenosis or occlusion (30-day) |                   |         | Symptomatic carotid stenosis or occlusion (90-day) |                   |         |
|---------------------------|----------------------------------------------------|-------------------|---------|----------------------------------------------------|-------------------|---------|
|                           | CEA (n=3617)                                       | CAS (n=3617)      | p-value | CEA (n=3054)                                       | CAS (n=3054)      | p-value |
|                           | No. of events (%)                                  | No. of events (%) |         | No. of events (%)                                  | No. of events (%) |         |
| Age Groups                |                                                    |                   | 0.56    |                                                    |                   | 0.36    |
| <65 years                 | 1152 (31.8)                                        | 1194 (33.0)       |         | 950 (31.1)                                         | 1002 (32.8)       |         |
| 65-79 years               | 1735 (48.0)                                        | 1698 (46.9)       |         | 1478 (48.4)                                        | 1440 (47.2)       |         |
| ≥80 years                 | 730 (20.2)                                         | 725 (20.0)        |         | 626 (20.5)                                         | 612 (20.0)        |         |
| Sex                       |                                                    |                   | 0.43    |                                                    |                   | 0.59    |
| Female                    | 1285 (35.5)                                        | 1317 (36.4)       |         | 1091 (35.7)                                        | 1111 (36.4)       |         |
| Male                      | 2332 (64.5)                                        | 2300 (63.6)       |         | 1963 (64.3)                                        | 1943 (63.6)       |         |
| Median household income   |                                                    |                   | >0.99   |                                                    |                   | 0.90    |
| 1 <sup>st</sup> quartile  | 1019 (28.2)                                        | 1013 (28.0)       |         | 885 (29.0)                                         | 870 (28.5)        |         |
| 2 <sup>nd</sup> quartile  | 973 (26.9)                                         | 974 (26.9)        |         | 812 (26.6)                                         | 815 (26.7)        |         |
| 3 <sup>rd</sup> quartile  | 923 (25.5)                                         | 921 (25.4)        |         | 761 (24.9)                                         | 784 (25.7)        |         |
| 4 <sup>th</sup> quartile  | 702 (19.4)                                         | 709 (19.6)        |         | 596 (19.5)                                         | 585 (19.2)        |         |
| Insurance                 |                                                    |                   | 0.59    |                                                    |                   | 0.63    |
| Medicare                  | 2422 (67)                                          | 2395 (66.2)       |         | 2062 (67.5)                                        | 2017 (66.0)       |         |
| Medicaid                  | 245 (6.8)                                          | 260 (7.2)         |         | 209 (6.8)                                          | 227 (7.4)         |         |
| Private                   | 724 (20.0)                                         | 712 (19.7)        |         | 590 (19.3)                                         | 613 (20.1)        |         |
| Self-pay/No charge/Other  | 226 (6.2)                                          | 250 (6.9)         |         | 193 (6.3)                                          | 197 (6.5)         |         |
| Hospital size             |                                                    |                   | 0.52    |                                                    |                   | 0.89    |
| Small                     | 159 (4.4)                                          | 172 (4.8)         |         | 155 (5.1)                                          | 147 (4.8)         |         |
| Medium                    | 564 (15.6)                                         | 589 (16.3)        |         | 504 (16.5)                                         | 507 (16.6)        |         |
| Large                     | 2894 (80.0)                                        | 2856 (79.0)       |         | 2395 (78.4)                                        | 2400 (78.6)       |         |
| Hospital Ownership Status |                                                    |                   | 0.70    |                                                    |                   | 0.55    |
| Government, nonfederal    | 503 (13.9)                                         | 515 (14.2)        |         | 393 (12.9)                                         | 419 (13.7)        |         |
| Private, not-profit       | 2602 (71.9)                                        | 2570 (71.1)       |         | 2222 (72.8)                                        | 2187 (71.6)       |         |
| Private, invest-own       | 512 (14.2)                                         | 532 (14.7)        |         | 439 (14.4)                                         | 448 (14.7)        |         |
| Hospital City Status      |                                                    |                   | 0.53    |                                                    |                   | 0.61    |
| Large City (>1ml)         | 2287 (63.2)                                        | 2313 (63.9)       |         | 1932 (63.3)                                        | 1951 (63.9)       |         |
| Small City (<1ml)         | 1330 (36.8)                                        | 1304 (36.1)       |         | 1122 (36.7)                                        | 1103 (36.1)       |         |
| Hospital Teaching Status  |                                                    |                   | 0.60    |                                                    |                   | 0.47    |
| Non-teaching              | 1047 (28.9)                                        | 1027 (28.4)       |         | 829 (27.1)                                         | 854 (28.0)        |         |
| Teaching                  | 2570 (71.0)                                        | 2590 (71.6)       |         | 2225 (72.9)                                        | 2200 (72.0)       |         |
| APR-DRG Mortality Risk    |                                                    |                   | 0.67    |                                                    |                   | 0.92    |
| Minor                     | 482 (13.3)                                         | 456 (12.6)        |         | 380 (12.4)                                         | 377 (12.3)        |         |
| Moderate                  | 2121 (58.6)                                        | 2146 (59.3)       |         | 1797 (58.8)                                        | 1798 (58.9)       |         |
| Major                     | 685 (18.9)                                         | 703 (19.4)        |         | 586 (19.2)                                         | 601 (19.7)        |         |
| Extreme                   | 329 (9.1)                                          | 312 (8.6)         |         | 291 (9.5)                                          | 278 (9.1)         |         |
| APR-DRG Severity          |                                                    |                   | 0.60    |                                                    |                   | 0.47    |
| Minor                     | 389 (10.8)                                         | 371 (10.3)        |         | 288 (9.4)                                          | 316 (10.3)        |         |
| Moderate                  | 782 (21.6)                                         | 800 (22.1)        |         | 696 (22.8)                                         | 667 (21.8)        |         |
| Major                     | 2116 (58.5)                                        | 2142 (59.2)       |         | 1780 (58.3)                                        | 1798 (58.9)       |         |
| Extreme                   | 330 (9.1)                                          | 304 (8.4)         |         | 290 (9.5)                                          | 273 (8.9)         |         |
| Comorbidity               |                                                    |                   | 0.53    |                                                    |                   | 0.63    |
| Score (Mean ± SD)         | 3.09 ± 1.85                                        | 3.06 ± 1.82       |         | 3.09 ± 1.81                                        | 3.07 ± 1.81       |         |

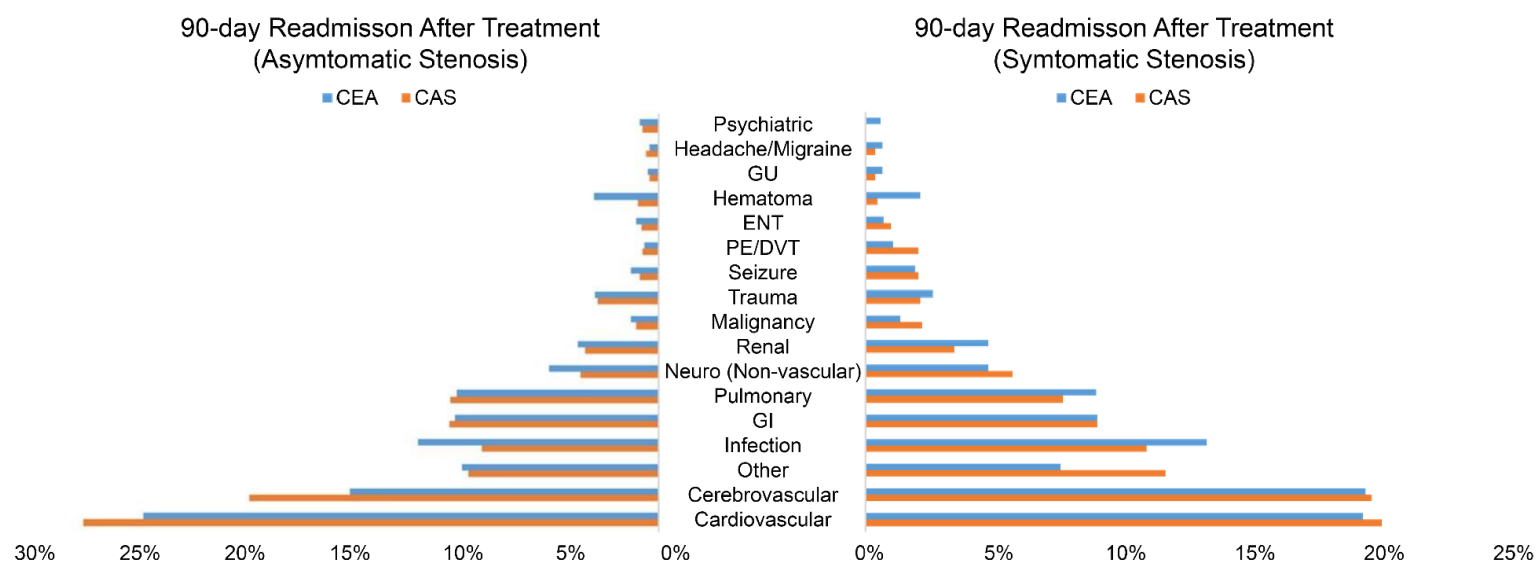

Supplementary Figure 1. Grouped categories tabulating proportion of causes of readmission for asymptomatic stenosis (left) and symptomatic stenosis (right).

CAS = carotid artery stenting; CEA = carotid endarterectomy; DVT = deep vein thrombosis; ENT = ear, nose, and throat; GI = gastrointestinal; GU = genitourinary; PE = pulmonary embolism.

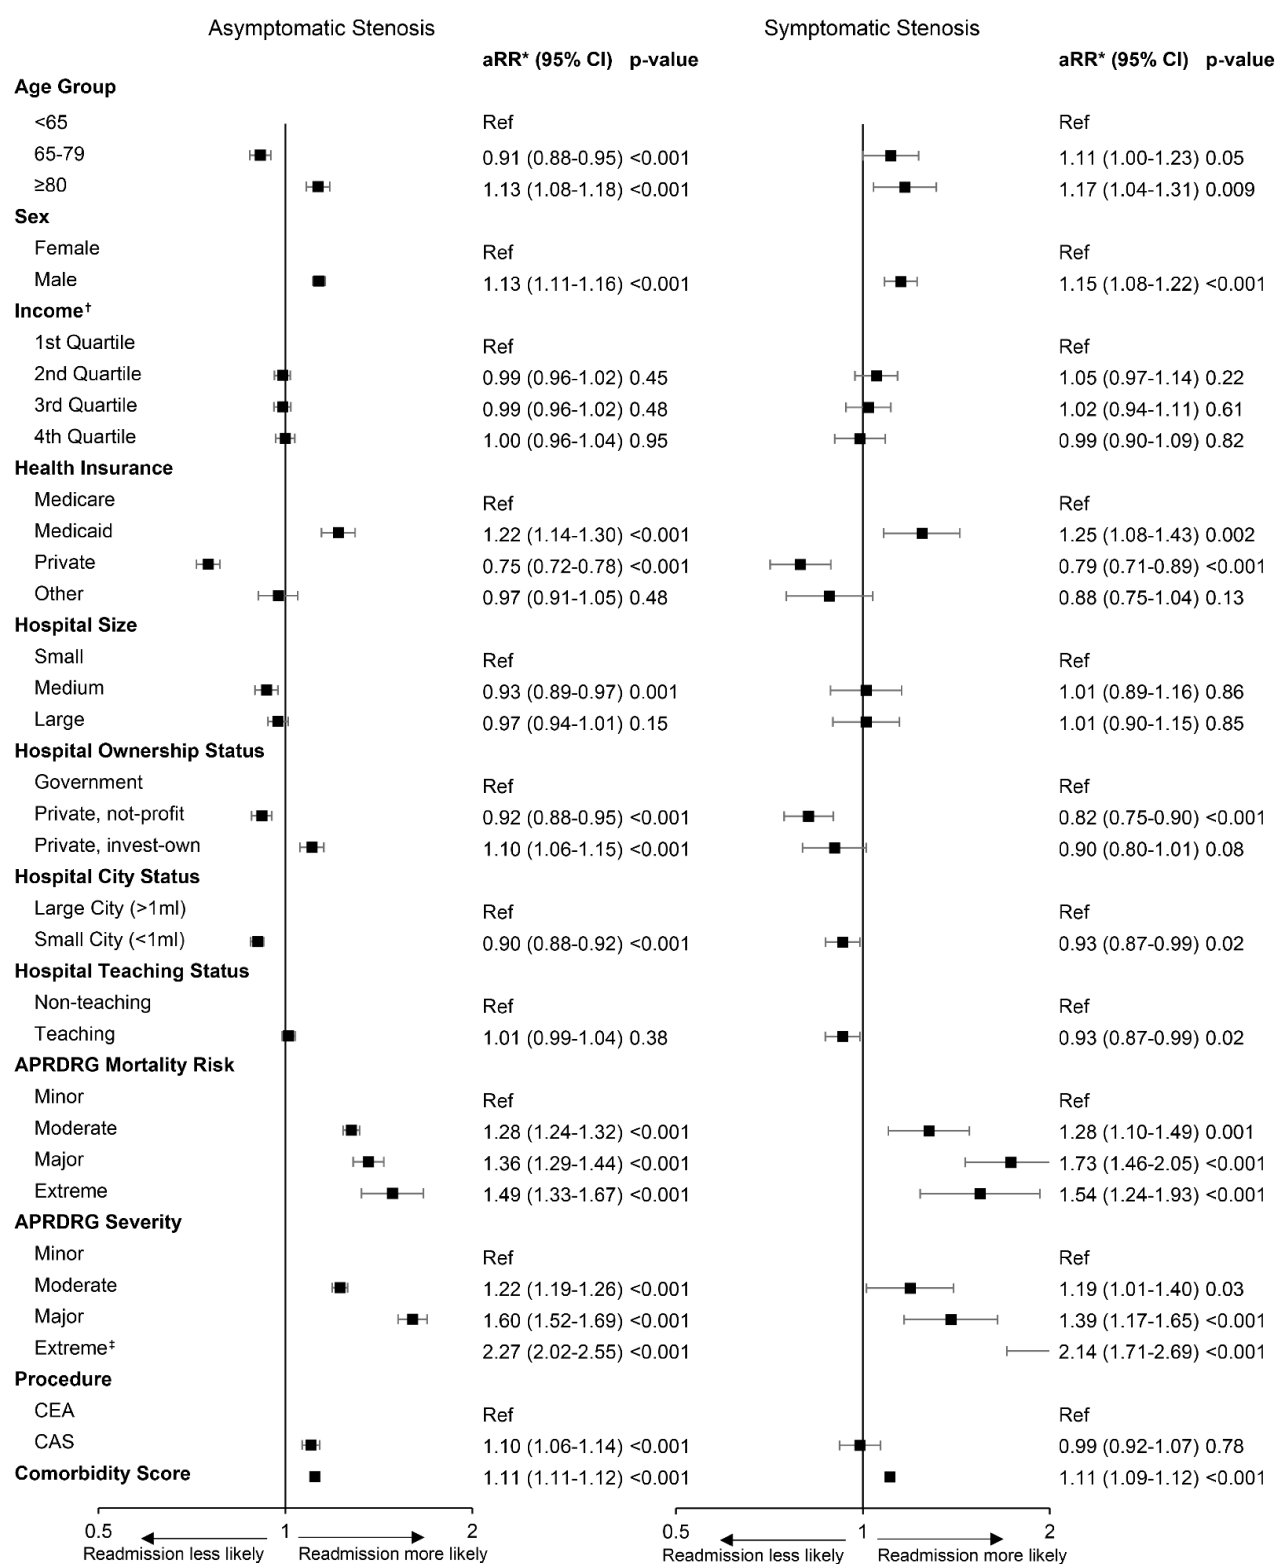

Supplementary Figure 2. 30-day readmission in asymptomatic and symptomatic patients after CEA or CAS.

APR-DRG = All Patients Refined Diagnosis Related Groups; aRR = adjusted risk ratio; CAS = carotid artery stenting; CEA = carotid endarterectomy; CI = confidence interval; ECI = Elixhauser comorbidity index; Ref = reference.

\* Risk ratios were adjusted for age, sex, race, household income, health insurance, hospital characteristics (type, region, size), APR-DRG severity and mortality and comorbidity indices, and type of procedure.

† Median household income for patient's ZIP Code, from lowest (1st) to highest (4th) quartile.

‡The marker for APR-DRG severity (extreme) exceeded the routine discharge scale.

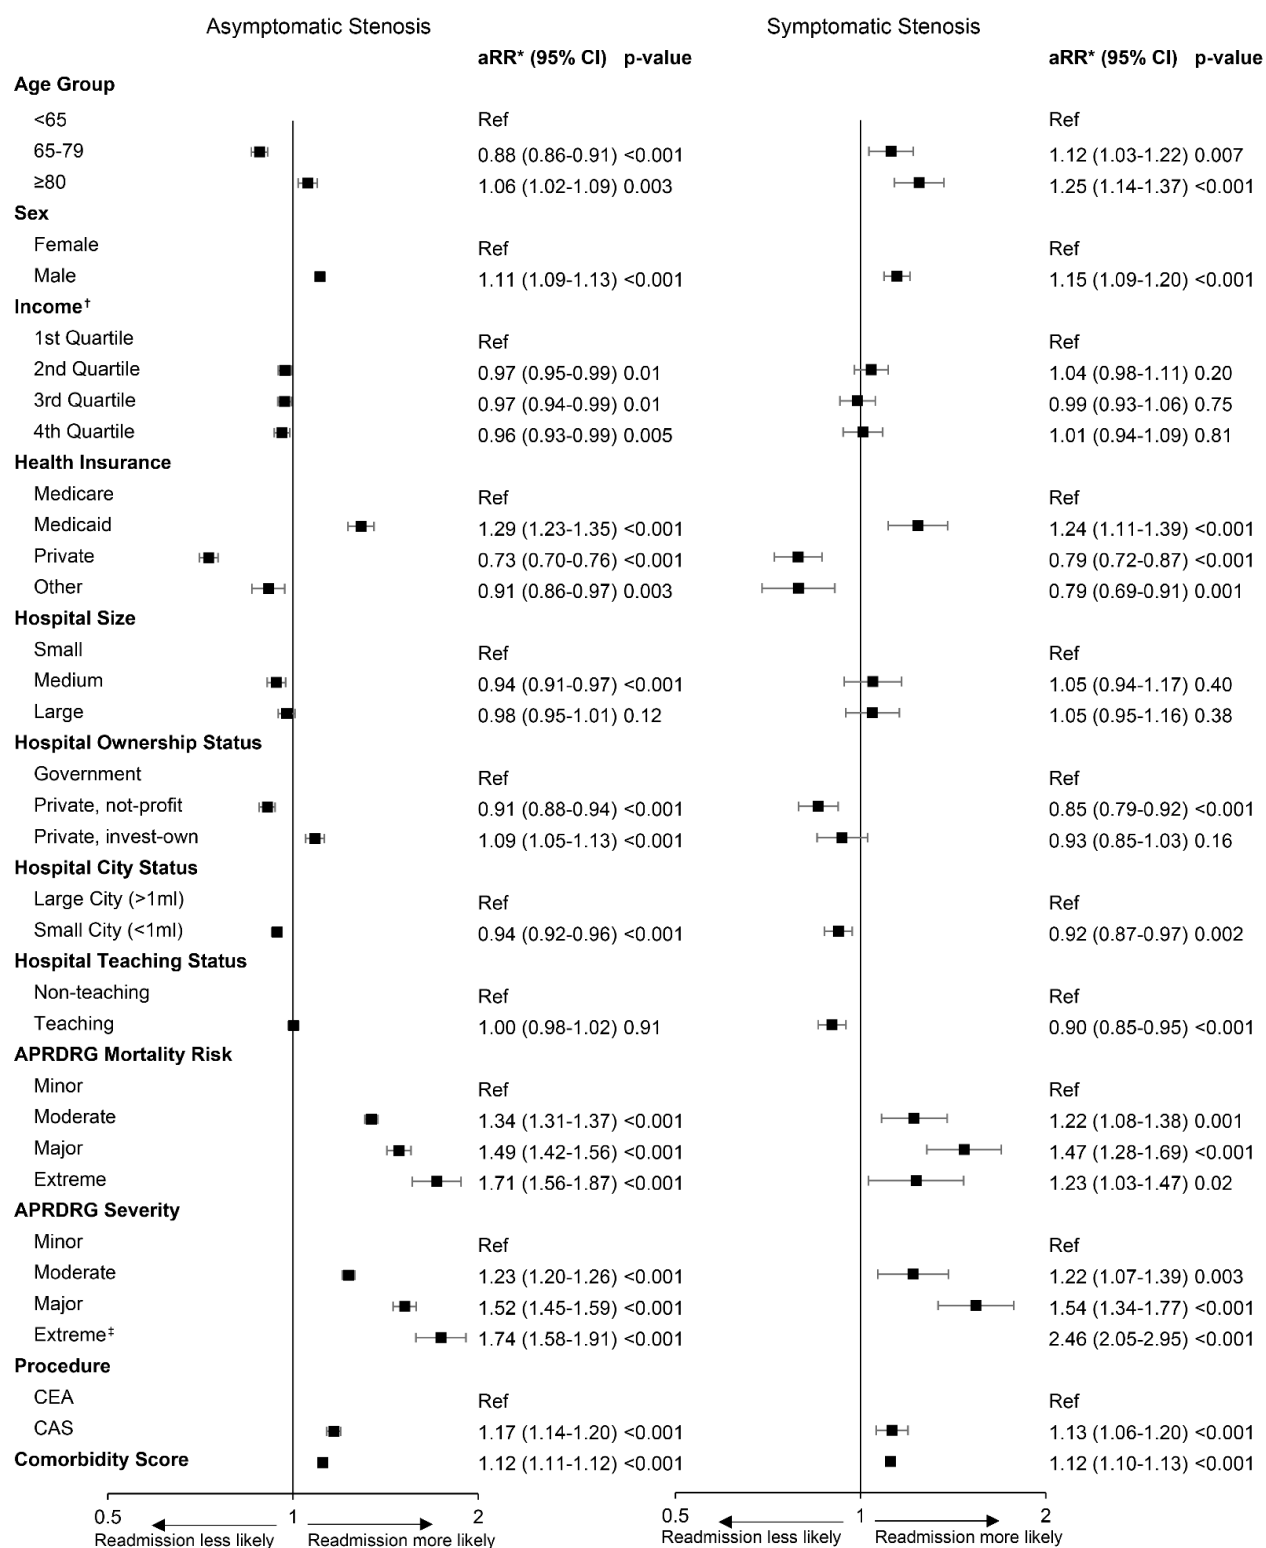

Supplementary Figure 3. 90-day readmission in asymptomatic and symptomatic patients after CEA or CAS.

APR-DRG = All Patients Refined Diagnosis Related Groups; aRR = adjusted risk ratio; CAS = carotid artery stenting; CEA = carotid endarterectomy; CI = confidence interval; ECI = Elixhauser comorbidity index; Ref = reference.

\* Risk ratios were adjusted for age, sex, race, household income, health insurance, hospital characteristics (type, region, size), APR-DRG severity and mortality and comorbidity indices, and type of procedure.

† Median household income for patient's ZIP Code, from lowest (1st) to highest (4th) quartile.

‡The marker for APR-DRG severity (extreme) exceeded the routine discharge scale.

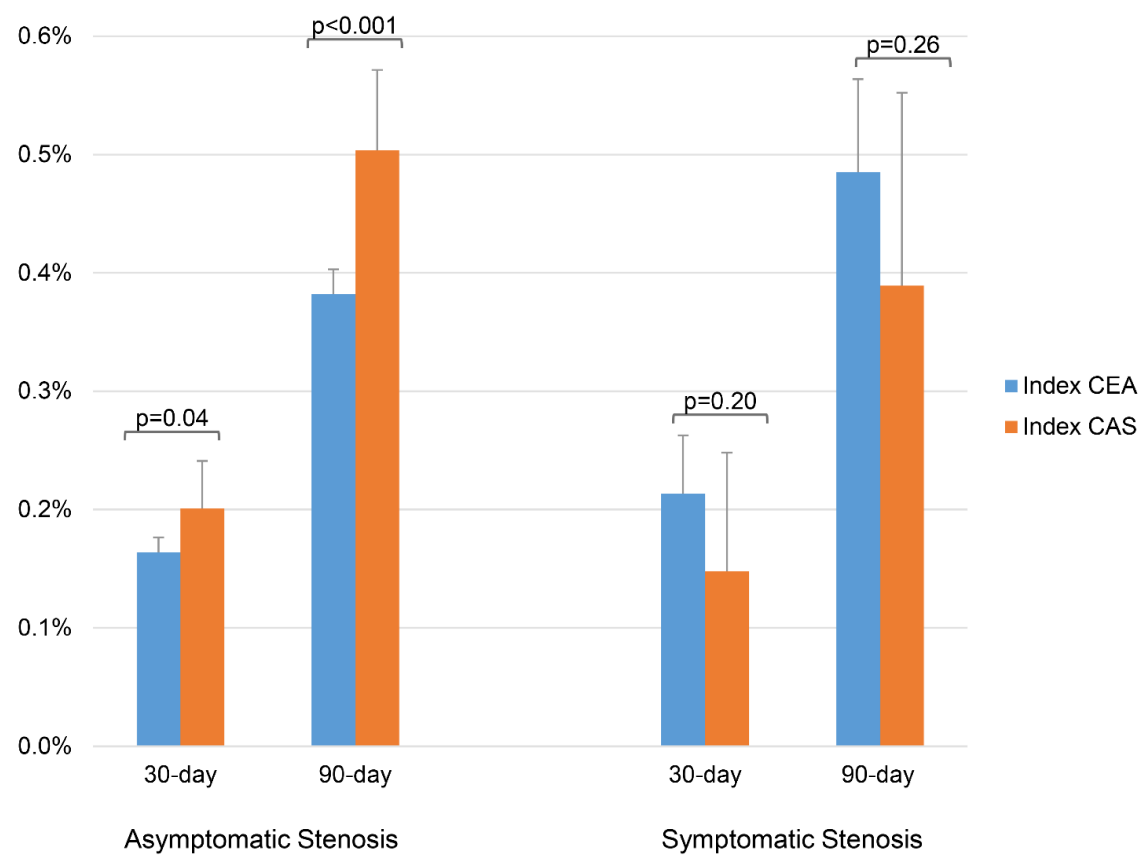

Supplementary Figure 4. Unplanned carotid revascularization after index CEA or CAS.

CAS = carotid artery stenting; CEA = carotid endarterectomy.



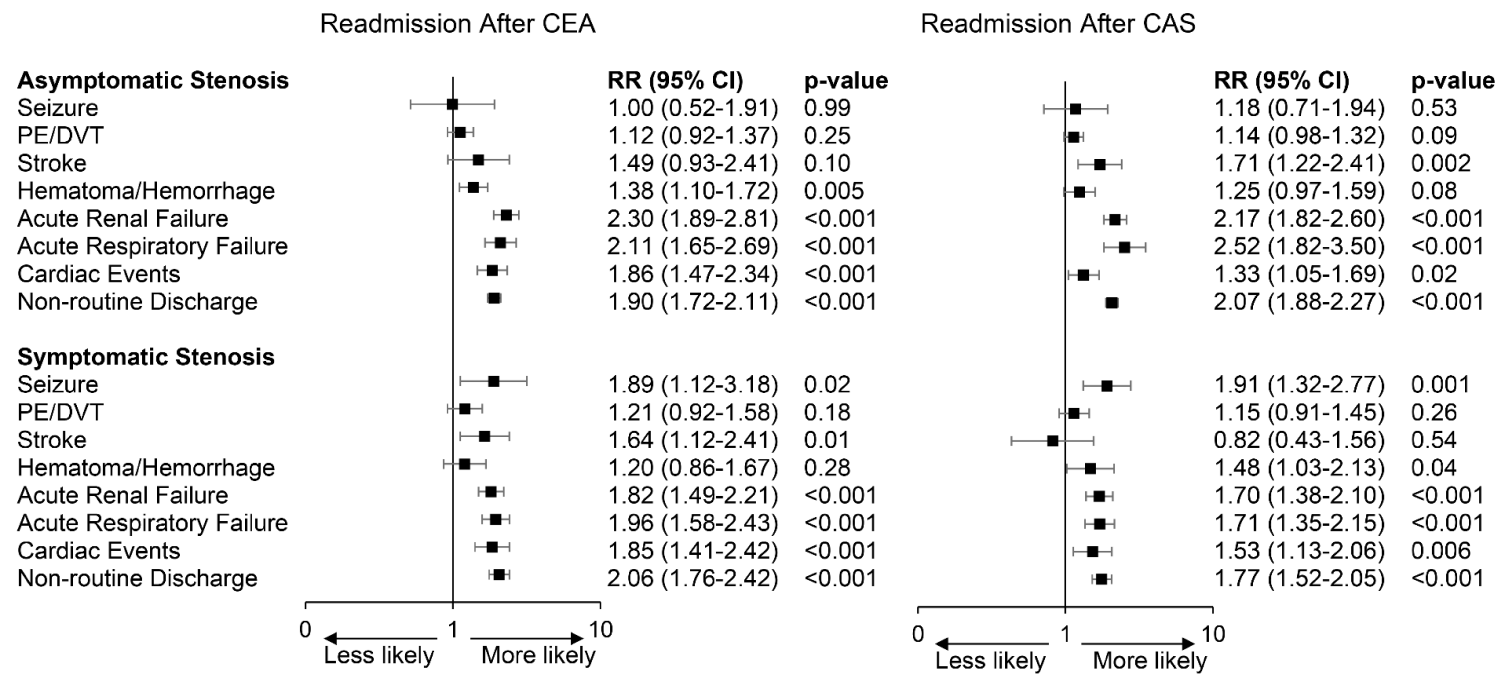

Supplementary Figure 5. Postoperative adverse events or outcome at initial carotid revascularization and risk ratio of 90-day readmission.

CAS = carotid artery stenting; CEA = carotid endarterectomy; CI = confidence interval, DVT = deep vein thrombosis; PE = pulmonary embolism; RR = risk ratio.
